# Supplementary material for: Year-Round Presence of Microcystins and Toxin-Producing Microcystis in the Water Column and Ice Cover of a Eutrophic Lake Located in the Continuous Permafrost Zone (Yakutia, Russia)
Source: MDPI journal article supplement (doi:10.3390/toxins15070467), 2023-07-20
Supplement: s1 [file s1]

# Supplementary: Year-Round Presence of Microcystins and Toxin-Producing *Microcystis* in the Water Column and Ice Cover of a Eutrophic Lake Located in the Continuous Permafrost Zone (Yakutia, Russia)

Viktor A. Gabyshev <sup>1</sup>, Sergey I. Sidelev <sup>2,3</sup>, Ekaterina N. Chernova <sup>4</sup>, Anna A. Vilnet <sup>5</sup>, Denis A. Davydov <sup>5,6</sup>, Sophia Barinova <sup>7,\*</sup>, Olga I. Gabysheva <sup>1</sup>, Zoya A. Zhakovskaya <sup>4</sup> and Ivan V. Voronov <sup>1</sup>

**Table S1a.** Abundance (mln cells L<sup>-1</sup>) and number of cyanobacterial species in surface water layer samples collected in Ytyk-Kyuyol Lake in ice-free period. “ – ” denotes to Species was not discovered in the sample, date format is DD.MM.YY

| Sampling Date                                                                                 | 01.08.21 | 27.05.22 | 22.06.22 | 28.07.22 | 11.08.22 | 27.08.22 | 26.09.22 |
|-----------------------------------------------------------------------------------------------|----------|----------|----------|----------|----------|----------|----------|
| <i>Anabaena aequalis</i> O.Borge                                                              | 0.36     | -        | -        | -        | -        | -        | -        |
| <i>Anabaena augstumalis</i> Schmidle                                                          | -        | -        | 3.13     | 1.17     | 0.90     | -        | -        |
| <i>Anabaena laxa</i> A.Braun                                                                  | -        | -        | -        | -        | -        | -        | -        |
| <i>Anathece clathrata</i> (West & G.S.West) Komárek, Kastovsky & Jezberová                    | 31.01    | 0.70     | 3.58     | -        | -        | 2.25     | 1.05     |
| <i>Anathece endophytica</i> (W. & G.S.West) Komárek, Kastovsky & Jezberová                    | -        | -        | -        | -        | 0.27     | 0.19     | 0.10     |
| <i>Aphanizomenon flos-aquae</i> Ralfs ex Bornet & Flahault                                    | 6.52     | 1.24     | 5.80     | 4.21     | 14.32    | 7.70     | 2.02     |
| <i>Aphanocapsa delicatissima</i> West & G.S.West                                              | -        | -        | 2.30     | 1.83     | -        | 1.44     | 0.93     |
| <i>Aphanocapsa grevillei</i> (Berkeley) Rabenhorst                                            | -        | 0.19     | 0.94     | 0.83     | -        | 2.10     | -        |
| <i>Aphanocapsa holsatica</i> (Lemmermann) G.Cronberg & Komárek                                | -        | -        | -        | -        | -        | -        | -        |
| <i>Aphanocapsa planctonica</i> (G.M.Smith) Komárek & Anagnostidis                             | 4.37     | -        | -        | -        | -        | -        | -        |
| <i>Aphanothece microscopica</i> Nägeli                                                        | -        | -        | -        | -        | -        | 0.01     | -        |
| <i>Coelomorion pusillum</i> (Van Goor) Komárek                                                | -        | -        | -        | -        | -        | -        | -        |
| <i>Dolichospermum circinale</i> (Rabenhorst ex Bornet & Flahault) Wacklin, Hoffmann & Komárek | -        | -        | -        | 0.19     | -        | -        | -        |
| <i>Dolichospermum smithii</i> (Komárek) Wacklin, L.Hoffmann & Komárek                         | -        | -        | -        | 0.28     | -        | -        | -        |
| <i>Dolichospermum spiroides</i> (Klebhan) Wacklin, L.Hoffmann & Komárek                       | 0.65     | -        | -        | -        | -        | -        | -        |
| <i>Dolichospermum viguieri</i> (Denis & Frémy) Wacklin, L.Hoffmann & Komárek                  | 2.00     | -        | -        | -        | -        | -        | -        |
| <i>Gomphosphaeria aponina</i> Kützing                                                         | -        | -        | -        | -        | -        | -        | -        |
| <i>Kamptonema chlorinum</i> (Kützing ex Gomont) Strunecký, Komárek & J.Smarda                 | -        | -        | -        | -        | -        | -        | -        |
| <i>Merismopedia minima</i> G.Beck in G.Beck & Zahlbruckner                                    | 198.68   | -        | -        | -        | -        | -        | -        |
| <i>Merismopedia tenuissima</i> Lemmermann                                                     | -        | 0.37     | 1.14     | 0.97     | 1.38     | 0.89     | -        |
| <i>Microcystis aeruginosa</i> (Kützing) Kützing                                               | -        | 2.07     | 52.94    | 35.55    | 43.58    | 33.32    | 16.46    |
| <i>Microcystis botrys</i> Teiling                                                             | -        | 0.04     | -        | 0.25     | 0.27     | 0.21     | 0.09     |
| <i>Microcystis flos-aquae</i> (Wittrock) Kirchner                                             | 79.65    | 15.80    | 24.39    | 29.99    | 41.04    | 29.84    | 13.68    |
| <i>Microcystis novacekii</i> (Komárek) Compère                                                | -        | -        | -        | -        | -        | -        | -        |
| <i>Microcystis pulvereae</i> (H.C.Wood) Forti                                                 | 13.33    | -        | -        | -        | -        | -        | -        |
| <i>Microcystis smithii</i> Komárek & Anagnostidis                                             | -        | -        | -        | -        | -        | -        | -        |
| <i>Microcystis wesenbergii</i> (Komárek) Komárek ex Komárek                                   | -        | -        | 0.66     | 0.95     | 1.70     | 1.85     | 0.70     |
| <i>Oscillatoria limosa</i> C.Agardh ex Gomont                                                 | -        | 0.01     | -        | -        | -        | -        | -        |
| <i>Oscillatoria simplicissima</i> Gomont                                                      | -        | -        | -        | -        | -        | -        | -        |
| <i>Phormidium ambiguuum</i> Gomont                                                            | -        | -        | 0.24     | -        | -        | -        | -        |
| <i>Rhabdogloea smithii</i> (Chodat & F.Chodat) Komárek                                        | -        | -        | -        | -        | -        | -        | 0.72     |
| <i>Snowella lacustris</i> (Chodat) Komárek & Hindák                                           | -        | -        | -        | -        | -        | -        | -        |
| <i>Woronichinia naegeliana</i> (Unger) Elenkin                                                | 6.06     | 0.17     | 1.68     | 4.59     | 7.13     | 2.79     | 1.35     |
| Number of discovered species in the sample                                                    | 10       | 9        | 11       | 12       | 9        | 12       | 10       |

**Table S1b.** Abundance (mln cells L<sup>-1</sup>) and number of cyanobacterial species in surface water layer samples collected in Ytyk-Kyuyol Lake in ice cover period. “ – ” denotes to Species was not discovered in the sample, date format is DD.MM.YY

| Sampling Date                                                                                       | 04.10.21 | 10.12.21 | 05.01.22 | 16.02.22 | 24.03.22 | 22.04.22 | 24.10.22 | 25.11.22 |
|-----------------------------------------------------------------------------------------------------|----------|----------|----------|----------|----------|----------|----------|----------|
| <i>Anabaena aequalis</i> O.Borge                                                                    | -        | -        | -        | -        | -        | -        | -        | -        |
| <i>Anabaena augstumalis</i> Schmidle                                                                | -        | -        | -        | -        | -        | -        | -        | -        |
| <i>Anabaena laxa</i> A.Braun                                                                        | -        | -        | -        | -        | -        | -        | -        | -        |
| <i>Anathece clathrata</i> (West & G.S.West)<br>Komárek, Kastovsky & Jezberová                       | 0.2527   | -        | -        | 0.0018   | -        | -        | -        | -        |
| <i>Anathece endophytica</i> (W. & G.S.West)<br>Komárek, Kastovsky & Jezberová                       | -        | -        | -        | -        | -        | -        | -        | -        |
| <i>Aphanizomenon flos-aquae</i> Ralfs ex Bornet<br>& Flahault                                       | 0.6210   | -        | -        | -        | -        | -        | 1.1884   | -        |
| <i>Aphanocapsa delicatissima</i> West & G.S.West                                                    | -        | -        | -        | -        | -        | -        | 0.5473   | -        |
| <i>Aphanocapsa grevillei</i> (Berkeley)<br>Rabenhorst                                               | -        | 0.0020   | -        | 0.0025   | -        | -        | 0.5691   | 0.0080   |
| <i>Aphanocapsa holsatica</i> (Lemmermann)<br>G.Cronberg & Komárek                                   | -        | -        | -        | -        | -        | -        | -        | -        |
| <i>Aphanocapsa planctonica</i> (G.M.Smith)<br>Komárek & Anagnostidis                                | -        | -        | -        | -        | -        | -        | -        | -        |
| <i>Aphanothece microscopica</i> Nägeli                                                              | -        | -        | -        | -        | 0.0014   | -        | -        | -        |
| <i>Coelomoron pusillum</i> (Van Goor) Komárek                                                       | -        | -        | -        | -        | -        | -        | -        | -        |
| <i>Dolichospermum circinale</i> (Rabenhorst ex<br>Bornet & Flahault) Wacklin, Hoffmann &<br>Komárek | -        | -        | -        | -        | -        | -        | -        | -        |
| <i>Dolichospermum smithii</i> (Komárek)<br>Wacklin, L.Hoffmann & Komárek                            | -        | -        | -        | -        | -        | -        | -        | -        |
| <i>Dolichospermum spiroides</i> (Klebhan)<br>Wacklin, L.Hoffmann & Komárek                          | 0.2470   | -        | -        | -        | -        | -        | -        | -        |
| <i>Dolichospermum viguieri</i> (Denis & Frémy)<br>Wacklin, L.Hoffmann & Komárek                     | -        | -        | -        | -        | -        | -        | -        | -        |
| <i>Gomphosphaeria aponina</i> Kützing                                                               | -        | -        | -        | -        | -        | -        | -        | -        |
| <i>Kamptonema chlorinum</i> (Kützing ex<br>Gomont) Strunecký, Komárek & J.Smarda                    | -        | -        | -        | -        | -        | -        | -        | -        |
| <i>Merismopedia minima</i> G.Beck in G.Beck &<br>Zahlbruckner                                       | 0.1800   | -        | -        | -        | -        | -        | -        | -        |
| <i>Merismopedia tenuissima</i> Lemmermann                                                           | -        | -        | -        | -        | -        | -        | -        | 0.0008   |
| <i>Microcystis aeruginosa</i> (Kützing) Kützing                                                     | 13.2126  | 0.0110   | -        | -        | -        | -        | 8.4357   | 0.0180   |
| <i>Microcystis botrys</i> Teiling                                                                   | -        | -        | -        | -        | -        | -        | 5.0748   | -        |
| <i>Microcystis flos-aquae</i> (Wittrock) Kirchner                                                   | 11.2552  | 0.0090   | 0.0085   | 0.0082   | 0.0067   | 0.0019   | 7.9579   | 0.0160   |
| <i>Microcystis novacekii</i> (Komárek) Compère                                                      | -        | -        | -        | -        | -        | -        | -        | -        |
| <i>Microcystis pulvereae</i> (H.C.Wood) Forti                                                       | -        | -        | -        | -        | -        | -        | -        | -        |
| <i>Microcystis smithii</i> Komárek &<br>Anagnostidis                                                | -        | -        | -        | -        | -        | -        | -        | -        |
| <i>Microcystis wesenbergii</i> (Komárek)<br>Komárek ex Komárek                                      | -        | -        | -        | -        | -        | -        | 0.3630   | -        |
| <i>Oscillatoria limosa</i> C.Agardh ex Gomont                                                       | -        | -        | -        | -        | -        | -        | -        | -        |
| <i>Oscillatoria simplicissima</i> Gomont                                                            | -        | -        | -        | -        | -        | -        | -        | -        |
| <i>Phormidium ambiguum</i> Gomont                                                                   | -        | -        | -        | -        | -        | -        | -        | -        |
| <i>Rhabdogloea smithii</i> (Chodat & F.Chodat)<br>Komárek                                           | -        | -        | -        | -        | -        | -        | -        | -        |
| <i>Snowella lacustris</i> (Chodat) Komárek &<br>Hindák                                              | -        | -        | -        | -        | 0.0028   | -        | -        | -        |
| <i>Woronichinia naegeliana</i> (Unger) Elenkin                                                      | 0.6270   | -        | -        | -        | 0.0024   | -        | -        | -        |
| Number of discovered species in the<br>sample                                                       | 7        | 3        | 1        | 3        | 4        | 1        | 7        | 4        |

**Table S1c.** Abundance (mln cells L<sup>-1</sup>) and number of cyanobacterial species in bottom water layer samples collected in Ytyk-Kyuyol Lake in ice-free period. “ – ” denotes to Species was not discovered in the sample, date format is DD.MM.YY

| Sampling Date                                                                                 | 22.06.22 | 28.07.22 | 27.08.22 | 26.09.22 |
|-----------------------------------------------------------------------------------------------|----------|----------|----------|----------|
| <i>Anabaena aequalis</i> O.Borge                                                              | -        | -        | -        | -        |
| <i>Anabaena augstumalis</i> Schmidle                                                          | 1.55     | -        | -        | -        |
| <i>Anabaena laxa</i> A.Braun                                                                  | -        | -        | -        | 0.33     |
| <i>Anathece clathrata</i> (West & G.S.West)                                                   | 2.12     | 2.51     | 2.29     | 0.98     |
| Komárek, Kastovsky & Jezberová                                                                |          |          |          |          |
| <i>Anathece endophytica</i> (W. & G.S.West)                                                   | -        | -        | 0.22     | 0.09     |
| Komárek, Kastovsky & Jezberová                                                                |          |          |          |          |
| <i>Aphanizomenon flos-aquae</i> Ralfs ex Bornet & Flahault                                    | 2.86     | 5.14     | 6.25     | -        |
| <i>Aphanocapsa delicatissima</i> West & G.S.West                                              | -        | 1.81     | 1.73     | -        |
| <i>Aphanocapsa grevillei</i> (Berkeley)                                                       | -        | 1.01     | -        | 0.75     |
| Rabenhorst                                                                                    |          |          |          |          |
| <i>Aphanocapsa holsatica</i> (Lemmermann)                                                     | -        | -        | 0.80     | -        |
| G.Cronberg & Komárek                                                                          |          |          |          |          |
| <i>Aphanocapsa planctonica</i> (G.M.Smith)                                                    | -        | -        | -        | -        |
| Komárek & Anagnostidis                                                                        |          |          |          |          |
| <i>Aphanothece microscopica</i> Nägeli                                                        | -        | -        | -        | -        |
| <i>Coelomoron pusillum</i> (Van Goor) Komárek                                                 | -        | -        | -        | -        |
| <i>Dolichospermum circinale</i> (Rabenhorst ex Bornet & Flahault) Wacklin, Hoffmann & Komárek | 0.14     | -        | -        | -        |
| <i>Dolichospermum smithii</i> (Komárek)                                                       | 0.28     | -        | -        | -        |
| Wacklin, L.Hoffmann & Komárek                                                                 |          |          |          |          |
| <i>Dolichospermum spiroides</i> (Klebhan)                                                     | -        | 0.63     | -        | -        |
| Wacklin, L.Hoffmann & Komárek                                                                 |          |          |          |          |
| <i>Dolichospermum viguieri</i> (Denis & Frémy)                                                | -        | -        | -        | -        |
| Wacklin, L.Hoffmann & Komárek                                                                 |          |          |          |          |
| <i>Gomphosphaeria aponina</i> Kützing                                                         | -        | -        | -        | -        |
| <i>Kamptonema chlorinum</i> (Kützing ex Gomont) Strunecký, Komárek & J.Smarda                 | -        | -        | -        | 0.22     |
| <i>Merismopedia minima</i> G.Beck in G.Beck & Zahlbruckner                                    | -        | -        | -        | -        |
| <i>Merismopedia tenuissima</i> Lemmermann                                                     | -        | -        | 0.90     | 0.34     |
| <i>Microcystis aeruginosa</i> (Kützing) Kützing                                               | 31.96    | 38.06    | 38.78    | 15.67    |
| <i>Microcystis botrys</i> Teiling                                                             | 0.17     | 0.23     | -        | -        |
| <i>Microcystis flos-aquae</i> (Wittrock) Kirchner                                             | 17.99    | 28.19    | 30.86    | 12.33    |
| <i>Microcystis novacekii</i> (Komárek) Compère                                                | -        | 1.13     | -        | -        |
| <i>Microcystis pulverea</i> (H.C.Wood) Forti                                                  | -        | -        | -        | -        |
| <i>Microcystis smithii</i> Komárek & Anagnostidis                                             | -        | -        | -        | -        |
| <i>Microcystis wesenbergii</i> (Komárek)                                                      | 0.64     | -        | 1.18     | 0.62     |
| Komárek ex Komárek                                                                            |          |          |          |          |
| <i>Oscillatoria limosa</i> C.Agardh ex Gomont                                                 | -        | -        | -        | -        |
| <i>Oscillatoria simplicissima</i> Gomont                                                      | -        | -        | -        | -        |
| <i>Phormidium ambiguum</i> Gomont                                                             | -        | -        | -        | -        |
| <i>Rhabdogloea smithii</i> (Chodat & F.Chodat)                                                | -        | -        | -        | -        |
| Komárek                                                                                       |          |          |          |          |
| <i>Snowella lacustris</i> (Chodat) Komárek & Hindák                                           | -        | -        | -        | 0.03     |
| <i>Woronichinia naegeliana</i> (Unger) Elenkin                                                | 2.95     | 3.24     | 2.60     | 1.30     |
| Number of discovered species in the sample                                                    | 10       | 10       | 10       | 11       |

**Table S1d.** Abundance (mln cells L<sup>-1</sup>) and number of cyanobacterial species in bottom water layer samples collected in Ytyk-Kyuyol Lake in ice cover period. “ – ” denotes to Species was not discovered in the sample, date format is DD.MM.YY

| Sampling Date                                                                                 | 10.12.21 | 05.01.22 | 16.02.22 | 24.03.22 | 22.04.22 | 24.10.22 | 25.11.22 |
|-----------------------------------------------------------------------------------------------|----------|----------|----------|----------|----------|----------|----------|
| <i>Anabaena aequalis</i> O.Borge                                                              | -        | -        | -        | -        | -        | -        | -        |
| <i>Anabaena augstumalis</i> Schmidle                                                          | -        | -        | -        | -        | -        | -        | -        |
| <i>Anabaena laxa</i> A.Braun                                                                  | -        | -        | -        | -        | -        | -        | -        |
| <i>Anathece clathrata</i> (West & G.S.West) Komárek, Kastovsky & Jezberová                    | -        | -        | -        | -        | -        | 0.416    | -        |
| <i>Anathece endophytica</i> (W. & G.S.West) Komárek, Kastovsky & Jezberová                    | -        | -        | -        | -        | -        | 0.046    | -        |
| <i>Aphanizomenon flos-aquae</i> Ralfs ex Bornet & Flahault                                    | -        | -        | -        | -        | -        | 0.594    | -        |
| <i>Aphanocapsa delicatissima</i> West & G.S.West                                              | -        | -        | 0.001    | -        | -        | 0.348    | -        |
| <i>Aphanocapsa grevillei</i> (Berkeley) Rabenhorst                                            | 0.003    | -        | -        | 0.002    | -        | -        | 0.010    |
| <i>Aphanocapsa holsatica</i> (Lemmermann) G.Cronberg & Komárek                                | -        | 0.002    | -        | -        | -        | -        | -        |
| <i>Aphanocapsa planctonica</i> (G.M.Smith) Komárek & Anagnostidis                             | -        | -        | -        | -        | -        | -        | -        |
| <i>Aphanothece microscopica</i> Nägeli                                                        | -        | -        | 0.002    | -        | -        | -        | -        |
| <i>Coelomonon pusillum</i> (Van Goor) Komárek                                                 | -        | -        | -        | -        | -        | -        | -        |
| <i>Dolichospermum circinale</i> (Rabenhorst ex Bornet & Flahault) Wacklin, Hoffmann & Komárek | -        | -        | -        | -        | -        | -        | -        |
| <i>Dolichospermum smithii</i> (Komárek) Wacklin, L.Hoffmann & Komárek                         | -        | -        | -        | -        | -        | -        | -        |
| <i>Dolichospermum spiroides</i> (Klebhan) Wacklin, L.Hoffmann & Komárek                       | -        | -        | -        | -        | -        | -        | -        |
| <i>Dolichospermum viguieri</i> (Denis & Frémy) Wacklin, L.Hoffmann & Komárek                  | -        | -        | -        | -        | -        | -        | -        |
| <i>Gomphosphaeria aponina</i> Kützing                                                         | -        | -        | -        | -        | -        | 0.0001   | -        |
| <i>Kamptonema chlorinum</i> (Kützing ex Gomont) Strunecký, Komárek & J.Smarda                 | -        | -        | -        | -        | -        | -        | -        |
| <i>Merismopedia minima</i> G.Beck in G.Beck & Zahlbruckner                                    | -        | -        | -        | -        | -        | -        | -        |
| <i>Merismopedia tenuissima</i> Lemmermann                                                     | -        | -        | -        | -        | -        | 0.097    | -        |
| <i>Microcystis aeruginosa</i> (Kützing) Kützing                                               | 0.010    | 0.011    | -        | -        | -        | 7.080    | 0.020    |
| <i>Microcystis botrys</i> Teiling                                                             | -        | -        | -        | -        | -        | -        | -        |
| <i>Microcystis flos-aquae</i> (Wittrock) Kirchner                                             | 0.008    | 0.009    | 0.009    | 0.007    | 0.002    | 7.546    | 0.018    |
| <i>Microcystis novacekii</i> (Komárek) Compère                                                | -        | -        | -        | -        | -        | -        | -        |
| <i>Microcystis pulvereae</i> (H.C.Wood) Forti                                                 | -        | -        | -        | -        | -        | -        | -        |
| <i>Microcystis smithii</i> Komárek & Anagnostidis                                             | -        | -        | -        | -        | -        | -        | -        |
| <i>Microcystis wesenbergii</i> (Komárek) Komárek ex Komárek                                   | -        | -        | -        | -        | -        | 0.265    | 0.005    |
| <i>Oscillatoria limosa</i> C.Agardh ex Gomont                                                 | -        | -        | -        | -        | -        | -        | -        |
| <i>Oscillatoria simplicissima</i> Gomont                                                      | 0.001    | -        | -        | -        | -        | -        | -        |
| <i>Phormidium ambiguum</i> Gomont                                                             | -        | -        | -        | -        | -        | -        | -        |
| <i>Rhabdogloea smithii</i> (Chodat & F.Chodat) Komárek                                        | -        | -        | -        | -        | -        | -        | -        |
| <i>Snowella lacustris</i> (Chodat) Komárek & Hindák                                           | -        | -        | -        | -        | -        | -        | -        |
| <i>Woronichinia naegeliana</i> (Unger) Elenkin                                                | -        | -        | -        | 0.002    | -        | 0.535    | 0.003    |
| Number of discovered species in the sample                                                    | 4        | 3        | 3        | 3        | 1        | 10       | 5        |

**Table S1e.** Abundance (mln cells L<sup>-1</sup>) and number of cyanobacterial species in ice samples collected in Ytyk-Kyuyol Lake. “ – ” denotes to Species was not discovered in the sample, date format is DD.MM.YY

| Sampling Date                                                                                       | 10.12.21 | 05.01.22 | 16.02.22 | 24.03.22 | 22.04.22 | 24.10.22 | 25.11.22 |
|-----------------------------------------------------------------------------------------------------|----------|----------|----------|----------|----------|----------|----------|
| <i>Anabaena aequalis</i> O.Borge                                                                    | -        | -        | -        | -        | -        | -        | -        |
| <i>Anabaena augstumalis</i> Schmidle                                                                | -        | -        | -        | -        | -        | -        | -        |
| <i>Anabaena laxa</i> A.Braun                                                                        | -        | -        | -        | -        | -        | -        | -        |
| <i>Anathece clathrata</i> (West & G.S.West)<br>Komárek, Kastovsky & Jezberová                       | -        | -        | -        | -        | -        | -        | -        |
| <i>Anathece endophytica</i> (W. & G.S.West)<br>Komárek, Kastovsky & Jezberová                       | -        | -        | -        | -        | -        | -        | -        |
| <i>Aphanizomenon flos-aquae</i> Ralfs ex Bornet & Flahault                                          | -        | -        | -        | -        | -        | -        | -        |
| <i>Aphanocapsa delicatissima</i> West & G.S.West                                                    | -        | -        | -        | -        | -        | -        | -        |
| <i>Aphanocapsa grevillei</i> (Berkeley) Rabenhorst                                                  | 0.002    | 0.002    | 0.002    | 0.004    | 0.002    | 0.610    | 0.023    |
| <i>Aphanocapsa holsatica</i> (Lemmermann)<br>G.Cronberg & Komárek                                   | -        | -        | -        | -        | -        | -        | -        |
| <i>Aphanocapsa planctonica</i> (G.M.Smith) Komárek<br>& Anagnostidis                                | -        | -        | -        | -        | -        | -        | -        |
| <i>Aphanothece microscopica</i> Nägeli                                                              | -        | -        | -        | -        | 0.001    | -        | -        |
| <i>Coelomoron pusillum</i> (Van Goor) Komárek                                                       | 0.001    | -        | -        | 0.003    | 0.001    | -        | -        |
| <i>Dolichospermum circinale</i> (Rabenhorst ex<br>Bornet & Flahault) Wacklin, Hoffmann &<br>Komárek | -        | -        | -        | -        | -        | -        | -        |
| <i>Dolichospermum smithii</i> (Komárek) Wacklin,<br>L.Hoffmann & Komárek                            | -        | -        | -        | -        | -        | -        | -        |
| <i>Dolichospermum spiroides</i> (Klebhan) Wacklin,<br>L.Hoffmann & Komárek                          | -        | -        | -        | -        | -        | -        | -        |
| <i>Dolichospermum viguieri</i> (Denis & Frémy)<br>Wacklin, L.Hoffmann & Komárek                     | -        | -        | -        | -        | -        | -        | -        |
| <i>Gomphosphaeria aponina</i> Kützing                                                               | -        | -        | -        | -        | -        | -        | -        |
| <i>Kamptonema chlorinum</i> (Kützing ex Gomont)<br>Strunecký, Komárek & J.Smarda                    | -        | -        | -        | -        | -        | -        | -        |
| <i>Merismopedia minima</i> G.Beck in G.Beck &<br>Zahlbruckner                                       | -        | -        | -        | -        | -        | -        | -        |
| <i>Merismopedia tenuissima</i> Lemmermann                                                           | -        | -        | -        | -        | -        | -        | -        |
| <i>Microcystis aeruginosa</i> (Kützing) Kützing                                                     | -        | 0.010    | -        | 0.002    | 0.002    | 16.527   | 0.032    |
| <i>Microcystis botrys</i> Teiling                                                                   | -        | -        | -        | -        | -        | 0.074    | -        |
| <i>Microcystis flos-aquae</i> (Wittrock) Kirchner                                                   | 0.009    | 0.008    | 0.008    | 0.003    | 0.002    | 18.277   | 0.025    |
| <i>Microcystis novacekii</i> (Komárek) Compère                                                      | -        | -        | -        | -        | -        | -        | -        |
| <i>Microcystis pulvereae</i> (H.C.Wood) Forti                                                       | -        | -        | -        | -        | -        | -        | -        |
| <i>Microcystis smithii</i> Komárek & Anagnostidis                                                   | -        | 0.004    | -        | -        | -        | -        | -        |
| <i>Microcystis wesenbergii</i> (Komárek) Komárek ex<br>Komárek                                      | 0.004    | -        | -        | -        | -        | 0.346    | 0.010    |
| <i>Oscillatoria limosa</i> C.Agardh ex Gomont                                                       | -        | -        | -        | -        | -        | -        | -        |
| <i>Oscillatoria simplicissima</i> Gomont                                                            | -        | -        | -        | -        | -        | -        | -        |
| <i>Phormidium ambiguum</i> Gomont                                                                   | -        | -        | -        | -        | -        | -        | -        |
| <i>Rhabdogloea smithii</i> (Chodat & F.Chodat)<br>Komárek                                           | -        | -        | -        | -        | -        | -        | 0.002    |
| <i>Snowella lacustris</i> (Chodat) Komárek &<br>Hindák                                              | 0.004    | 0.003    | -        | -        | 0.001    | -        | -        |
| <i>Woronichinia naegelianae</i> (Unger) Elenkin                                                     | -        | -        | 0.003    | 0.002    | 0.002    | -        | -        |
| Number of discovered species in the sample                                                          | 5        | 5        | 3        | 5        | 7        | 5        | 5        |

**Table S2a.** Biomass (mg L<sup>-1</sup>) of cyanobacterial species in surface water layer samples collected in Ytyk-Kyuyol Lake in ice-free period. “-” denotes to Species was not discovered in the sample, date format is DD.MM.YY.

| Sampling Date                                                                                 | 01.08.21 | 27.05.22 | 22.06.22 | 28.07.22 | 11.08.22 | 27.08.22 | 26.09.22 |
|-----------------------------------------------------------------------------------------------|----------|----------|----------|----------|----------|----------|----------|
| <i>Anabaena aequalis</i> O.Borge                                                              | 0.04     | -        | -        | -        | -        | -        | -        |
| <i>Anabaena augstumalis</i> Schmidle                                                          | -        | -        | 0.328    | 0.123    | 0.095    | -        | -        |
| <i>Anabaena laxa</i> A.Braun                                                                  | -        | -        | -        | -        | -        | -        | -        |
| <i>Anathece clathrata</i> (West & G.S.West) Komárek, Kastovsky & Jezberová                    | 0.04     | 0.001    | 0.004    | -        | -        | 0.003    | 0.001    |
| <i>Anathece endophytica</i> (W. & G.S.West) Komárek, Kastovsky & Jezberová                    | -        | -        | -        | -        | 0.0004   | 0.0003   | 0.0002   |
| <i>Aphanizomenon flos-aquae</i> Ralfs ex Bornet & Flahault                                    | 0.60     | 0.018    | 0.082    | 0.060    | 0.203    | 0.109    | 0.029    |
| <i>Aphanocapsa delicatissima</i> West & G.S.West                                              | -        | -        | 0.002    | 0.001    | -        | 0.001    | 0.001    |
| <i>Aphanocapsa grevillei</i> (Berkeley) Rabenhorst                                            | -        | 0.008    | 0.037    | 0.033    | -        | 0.083    | -        |
| <i>Aphanocapsa holsatica</i> (Lemmermann) G.Cronberg & Komárek                                | -        | -        | -        | -        | -        | -        | -        |
| <i>Aphanocapsa planctonica</i> (G.M.Smith) Komárek & Anagnostidis                             | 0.04     | -        | -        | -        | -        | -        | -        |
| <i>Aphanothece microscopica</i> Nägeli                                                        | -        | -        | -        | -        | -        | 0.0002   | -        |
| <i>Coelomorion pusillum</i> (Van Goor) Komárek                                                | -        | -        | -        | -        | -        | -        | -        |
| <i>Dolichospermum circinale</i> (Rabenhorst ex Bornet & Flahault) Wacklin, Hoffmann & Komárek | -        | -        | -        | 0.060    | -        | -        | -        |
| <i>Dolichospermum smithii</i> (Komárek) Wacklin, L.Hoffmann & Komárek                         | -        | -        | -        | 0.025    | -        | -        | -        |
| <i>Dolichospermum spiroides</i> (Klebhan) Wacklin, L.Hoffmann & Komárek                       | 0.15     | -        | -        | -        | -        | -        | -        |
| <i>Dolichospermum viguieri</i> (Denis & Frémy) Wacklin, L.Hoffmann & Komárek                  | 0.30     | -        | -        | -        | -        | -        | -        |
| <i>Gomphosphaeria aponina</i> Kützing                                                         | -        | -        | -        | -        | -        | -        | -        |
| <i>Kamptonema chlorinum</i> (Kützing ex Gomont) Strunecký, Komárek & J.Smarda                 | -        | -        | -        | -        | -        | -        | -        |
| <i>Merismopedia minima</i> G.Beck in G.Beck & Zahlbruckner                                    | 0.03     | -        | -        | -        | -        | -        | -        |
| <i>Merismopedia tenuissima</i> Lemmermann                                                     | -        | 0.001    | 0.004    | 0.003    | 0.005    | 0.003    | -        |
| <i>Microcystis aeruginosa</i> (Kützing) Kützing                                               | -        | 0.096    | 2.460    | 1.652    | 2.025    | 1.549    | 0.765    |
| <i>Microcystis botrys</i> Teiling                                                             | -        | 0.004    | -        | 0.028    | 0.030    | 0.024    | 0.010    |
| <i>Microcystis flos-aquae</i> (Wittrock) Kirchner                                             | 3.20     | 0.664    | 1.025    | 1.260    | 1.724    | 1.254    | 0.575    |
| <i>Microcystis novacekii</i> (Komárek) Compère                                                | -        | -        | -        | -        | -        | -        | -        |
| <i>Microcystis pulverea</i> (H.C.Wood) Forti                                                  | 0.20     | -        | -        | -        | -        | -        | -        |
| <i>Microcystis smithii</i> Komárek & Anagnostidis                                             | -        | -        | -        | -        | -        | -        | -        |
| <i>Microcystis wesenbergii</i> (Komárek) Komárek ex Komárek                                   | -        | -        | 0.062    | 0.088    | 0.158    | 0.172    | 0.065    |
| <i>Oscillatoria limosa</i> C.Agardh ex Gomont                                                 | -        | 0.002    | -        | -        | -        | -        | -        |
| <i>Oscillatoria simplicissima</i> Gomont                                                      | -        | -        | -        | -        | -        | -        | -        |
| <i>Phormidium ambiguum</i> Gomont                                                             | -        | -        | 0.033    | -        | -        | -        | -        |
| <i>Rhabdogloea smithii</i> (Chodat & F.Chodat) Komárek                                        | -        | -        | -        | -        | -        | -        | 0.005    |
| <i>Snowella lacustris</i> (Chodat) Komárek & Hindák                                           | -        | -        | -        | -        | -        | -        | -        |
| <i>Woronichinia naegelianae</i> (Unger) Elenkin                                               | 0.20     | 0.006    | 0.062    | 0.168    | 0.261    | 0.102    | 0.050    |

**Table S2b.** Biomass (mg L<sup>-1</sup>) of cyanobacterial species in surface water layer samples collected in Ytyk-Kyuyol Lake in ice cover period. “ – ” denotes to Species was not discovered in the sample, date format is DD.MM.YY.

| Sampling Date                                                                                 | 04.10.21 | 10.12.21 | 05.01.22 | 16.02.22 | 24.03.22 | 22.04.22 | 24.10.22 | 25.11.22 |
|-----------------------------------------------------------------------------------------------|----------|----------|----------|----------|----------|----------|----------|----------|
| <i>Anabaena aequalis</i> O.Borge                                                              | -        | -        | -        | -        | -        | -        | -        | -        |
| <i>Anabaena augstumalis</i> Schmidle                                                          | -        | -        | -        | -        | -        | -        | -        | -        |
| <i>Anabaena laxa</i> A.Braun                                                                  | -        | -        | -        | -        | -        | -        | -        | -        |
| <i>Anathece clathrata</i> (West & G.S.West) Komárek, Kastovsky & Jezberová                    | 0.0003   | -        | -        | 0.000001 | -        | -        | -        | -        |
| <i>Anathece endophytica</i> (W. & G.S.West) Komárek, Kastovsky & Jezberová                    | -        | -        | -        | -        | -        | -        | -        | -        |
| <i>Aphanizomenon flos-aquae</i> Ralfs ex Bornet & Flahault                                    | 0.0111   | -        | -        | -        | -        | -        | 0.0168   | -        |
| <i>Aphanocapsa delicatissima</i> West & G.S.West                                              | -        | -        | -        | -        | -        | -        | 0.0004   | -        |
| <i>Aphanocapsa grevillei</i> (Berkeley) Rabenhorst                                            | -        | 0.0001   | -        | 0.0001   | -        | -        | 0.0224   | 0.0003   |
| <i>Aphanocapsa holsatica</i> (Lemmermann) G.Cronberg & Komárek                                | -        | -        | -        | -        | -        | -        | -        | -        |
| <i>Aphanocapsa planctonica</i> (G.M.Smith) Komárek & Anagnostidis                             | -        | -        | -        | -        | -        | -        | -        | -        |
| <i>Aphanothece microscopica</i> Nägeli                                                        | -        | -        | -        | -        | 0.00003  | -        | -        | -        |
| <i>Coelomonon pusillum</i> (Van Goor) Komárek                                                 | -        | -        | -        | -        | -        | -        | -        | -        |
| <i>Dolichospermum circinale</i> (Rabenhorst ex Bornet & Flahault) Wacklin, Hoffmann & Komárek | -        | -        | -        | -        | -        | -        | -        | -        |
| <i>Dolichospermum smithii</i> (Komárek) Wacklin, L.Hoffmann & Komárek                         | -        | -        | -        | -        | -        | -        | -        | -        |
| <i>Dolichospermum spiroides</i> (Klebhan) Wacklin, L.Hoffmann & Komárek                       | 0.0213   | -        | -        | -        | -        | -        | -        | -        |
| <i>Dolichospermum viguieri</i> (Denis & Frémy) Wacklin, L.Hoffmann & Komárek                  | -        | -        | -        | -        | -        | -        | -        | -        |
| <i>Gomphosphaeria aponina</i> Kützing                                                         | -        | -        | -        | -        | -        | -        | -        | -        |
| <i>Kamptonema chlorinum</i> (Kützing ex Gomont) Strunecký, Komárek & J.Smarda                 | -        | -        | -        | -        | -        | -        | -        | -        |
| <i>Merismopedia minima</i> G.Beck in G.Beck & Zahlbruckner                                    | 0.00003  | -        | -        | -        | -        | -        | -        | -        |
| <i>Merismopedia tenuissima</i> Lemmermann                                                     | -        | -        | -        | -        | -        | -        | -        | 0.000003 |
| <i>Microcystis aeruginosa</i> (Kützing) Kützing                                               | 0.8730   | 0.0004   | -        | -        | -        | -        | 0.3920   | 0.0006   |
| <i>Microcystis botrys</i> Teiling                                                             | -        | -        | -        | -        | -        | -        | 0.5700   | -        |
| <i>Microcystis flos-aquae</i> (Wittrock) Kirchner                                             | 0.7297   | 0.0003   | 0.0003   | 0.0003   | 0.0001   | 0.0001   | 0.3344   | 0.0005   |
| <i>Microcystis novacekii</i> (Komárek) Compère                                                | -        | -        | -        | -        | -        | -        | -        | -        |
| <i>Microcystis pulverea</i> (H.C.Wood) Forti                                                  | -        | -        | -        | -        | -        | -        | -        | -        |
| <i>Microcystis smithii</i> Komárek & Anagnostidis                                             | -        | -        | -        | -        | -        | -        | -        | -        |
| <i>Microcystis wesenbergii</i> (Komárek) Komárek ex Komárek                                   | -        | -        | -        | -        | -        | -        | 0.0336   | -        |
| <i>Oscillatoria limosa</i> C.Agardh ex Gomont                                                 | -        | -        | -        | -        | -        | -        | -        | -        |
| <i>Oscillatoria simplicissima</i> Gomont                                                      | -        | -        | -        | -        | -        | -        | -        | -        |
| <i>Phormidium ambiguum</i> Gomont                                                             | -        | -        | -        | -        | -        | -        | -        | -        |
| <i>Rhabdogloea smithii</i> (Chodat & F.Chodat) Komárek                                        | -        | -        | -        | -        | -        | -        | -        | -        |
| <i>Snowella lacustris</i> (Chodat) Komárek & Hindák                                           | -        | -        | -        | -        | 0.0001   | -        | -        | -        |
| <i>Woronichinia naegelianae</i> (Unger) Elenkin                                               | 0.0447   | -        | -        | -        | 0.0001   | -        | -        | -        |

**Table S2c.** Biomass (mg L<sup>-1</sup>) of cyanobacterial species in bottom water layer samples collected in Ytyk-Kyuyol Lake in ice-free period. “ – ” denotes to Species was not discovered in the sample, date format is DD.MM.YY.

| Sampling Date                                                                                 | 22.06.22 | 28.07.22 | 27.08.22 | 26.09.22 |
|-----------------------------------------------------------------------------------------------|----------|----------|----------|----------|
| <i>Anabaena aequalis</i> O.Borge                                                              | -        | -        | -        | -        |
| <i>Anabaena augstumalis</i> Schmidle                                                          | 0.162    | -        | -        | -        |
| <i>Anabaena laxa</i> A.Braun                                                                  | -        | -        | -        | 0.013    |
| <i>Anathece clathrata</i> (West & G.S.West) Komárek, Kastovsky & Jezberová                    | 0.002    | 0.003    | 0.003    | 0.001    |
| <i>Anathece endophytica</i> (W. & G.S.West) Komárek, Kastovsky & Jezberová                    | -        | -        | 0.0003   | 0.0001   |
| <i>Aphanizomenon flos-aquae</i> Ralfs ex Bornet & Flahault                                    | 0.041    | 0.073    | 0.088    | -        |
| <i>Aphanocapsa delicatissima</i> West & G.S.West                                              | -        | 0.001    | 0.001    | -        |
| <i>Aphanocapsa grevillei</i> (Berkeley) Rabenhorst                                            | -        | 0.040    | -        | 0.029    |
| <i>Aphanocapsa holsatica</i> (Lemmermann) G.Cronberg & Komárek                                | -        | -        | 0.0003   | -        |
| <i>Aphanocapsa planctonica</i> (G.M.Smith) Komárek & Anagnostidis                             | -        | -        | -        | -        |
| <i>Aphanothece microscopica</i> Nägeli                                                        | -        | -        | -        | -        |
| <i>Coelomoron pusillum</i> (Van Goor) Komárek                                                 | -        | -        | -        | -        |
| <i>Dolichospermum circinale</i> (Rabenhorst ex Bornet & Flahault) Wacklin, Hoffmann & Komárek | 0.045    | -        | -        | -        |
| <i>Dolichospermum smithii</i> (Komárek) Wacklin, L.Hoffmann & Komárek                         | 0.024    | -        | -        | -        |
| <i>Dolichospermum spiroides</i> (Klebhan) Wacklin, L.Hoffmann & Komárek                       | -        | 0.050    | -        | -        |
| <i>Dolichospermum viguieri</i> (Denis & Frémy) Wacklin, L.Hoffmann & Komárek                  | -        | -        | -        | -        |
| <i>Gomphosphaeria aponina</i> Kützing                                                         | -        | -        | -        | -        |
| <i>Kamptonema chlorinum</i> (Kützing ex Gomont) Strunecký, Komárek & J.Smarda                 | -        | -        | -        | 0.008    |
| <i>Merismopedia minima</i> G.Beck in G.Beck & Zahlbruckner                                    | -        | -        | -        | -        |
| <i>Merismopedia tenuissima</i> Lemmermann                                                     | -        | -        | 0.003    | 0.001    |
| <i>Microcystis aeruginosa</i> (Kützing) Kützing                                               | 1.485    | 1.769    | 1.802    | 0.728    |
| <i>Microcystis botrys</i> Teiling                                                             | 0.019    | 0.025    | -        | -        |
| <i>Microcystis flos-aquae</i> (Wittrock) Kirchner                                             | 0.756    | 1.184    | 1.297    | 0.518    |
| <i>Microcystis novacekii</i> (Komárek) Compère                                                | -        | 0.040    | -        | -        |
| <i>Microcystis pulverea</i> (H.C.Wood) Forti                                                  | -        | -        | -        | -        |
| <i>Microcystis smithii</i> Komárek & Anagnostidis                                             | -        | -        | -        | -        |
| <i>Microcystis wesenbergii</i> (Komárek) Komárek ex Komárek                                   | 0.059    | -        | 0.109    | 0.057    |
| <i>Oscillatoria limosa</i> C.Agardh ex Gomont                                                 | -        | -        | -        | -        |
| <i>Oscillatoria simplicissima</i> Gomont                                                      | -        | -        | -        | -        |
| <i>Phormidium ambiguum</i> Gomont                                                             | -        | -        | -        | -        |
| <i>Rhabdogloea smithii</i> (Chodat & F.Chodat) Komárek                                        | -        | -        | -        | -        |
| <i>Snowella lacustris</i> (Chodat) Komárek & Hindák                                           | -        | -        | -        | 0.001    |
| <i>Woronichinia naegeliana</i> (Unger) Elenkin                                                | 0.108    | 0.119    | 0.095    | 0.048    |



**Table S2d.** Biomass (mg L<sup>-1</sup>) of cyanobacterial species in bottom water layer samples collected in Ytyk-Kyuyol Lake in ice cover period. “ – ” denotes to Species was not discovered in the sample, date format is DD.MM.YY.

| Sampling Date                                                                                 | 10.12.21 | 05.01.22 | 16.02.22 | 24.03.22 | 22.04.22 | 24.10.22 | 25.11.22 |
|-----------------------------------------------------------------------------------------------|----------|----------|----------|----------|----------|----------|----------|
| <i>Anabaena aequalis</i> O.Borge                                                              | -        | -        | -        | -        | -        | -        | -        |
| <i>Anabaena augstumalis</i> Schmidle                                                          | -        | -        | -        | -        | -        | -        | -        |
| <i>Anabaena laxa</i> A.Braun                                                                  | -        | -        | -        | -        | -        | -        | -        |
| <i>Anathece clathrata</i> (West & G.S.West) Komárek, Kastovsky & Jezberová                    | -        | -        | -        | -        | -        | 0.0005   | -        |
| <i>Anathece endophytica</i> (W. & G.S.West) Komárek, Kastovsky & Jezberová                    | -        | -        | -        | -        | -        | 0.0001   | -        |
| <i>Aphanizomenon flos-aquae</i> Ralfs ex Bornet & Flahault                                    | -        | -        | -        | -        | -        | 0.0084   | -        |
| <i>Aphanocapsa delicatissima</i> West & G.S.West                                              | -        | -        | 0.000001 | -        | -        | 0.0003   | -        |
| <i>Aphanocapsa grevillei</i> (Berkeley) Rabenhorst                                            | 0.0001   | -        | -        | 0.0001   | -        | -        | 0.0003   |
| <i>Aphanocapsa holsatica</i> (Lemmermann) G.Cronberg & Komárek                                | -        | 0.000001 | -        | -        | -        | -        | -        |
| <i>Aphanocapsa planctonica</i> (G.M.Smith) Komárek & Anagnostidis                             | -        | -        | -        | -        | -        | -        | -        |
| <i>Aphanothece microscopica</i> Nägeli                                                        | -        | -        | 0.00004  | -        | -        | -        | -        |
| <i>Coelomorion pusillum</i> (Van Goor) Komárek                                                | -        | -        | -        | -        | -        | -        | -        |
| <i>Dolichospermum circinale</i> (Rabenhorst ex Bornet & Flahault) Wacklin, Hoffmann & Komárek | -        | -        | -        | -        | -        | -        | -        |
| <i>Dolichospermum smithii</i> (Komárek) Wacklin, L.Hoffmann & Komárek                         | -        | -        | -        | -        | -        | -        | -        |
| <i>Dolichospermum spiroides</i> (Klebhan) Wacklin, L.Hoffmann & Komárek                       | -        | -        | -        | -        | -        | -        | -        |
| <i>Dolichospermum viguieri</i> (Denis & Frémy) Wacklin, L.Hoffmann & Komárek                  | -        | -        | -        | -        | -        | -        | -        |
| <i>Gomphosphaeria aponina</i> Kützing                                                         | -        | -        | -        | -        | -        | 0.00001  | -        |
| <i>Kamptonema chlorinum</i> (Kützing ex Gomont) Strunecký, Komárek & J.Smarda                 | -        | -        | -        | -        | -        | -        | -        |
| <i>Merismopedia minima</i> G.Beck in G.Beck & Zahlbruckner                                    | -        | -        | -        | -        | -        | -        | -        |
| <i>Merismopedia tenuissima</i> Lemmermann                                                     | -        | -        | -        | -        | -        | 0.0003   | -        |
| <i>Microcystis aeruginosa</i> (Kützing) Kützing                                               | 0.0003   | 0.0003   | -        | -        | -        | 0.3290   | 0.0007   |
| <i>Microcystis botrys</i> Teiling                                                             | -        | -        | -        | -        | -        | -        | -        |
| <i>Microcystis flos-aquae</i> (Wittrock) Kirchner                                             | 0.0003   | 0.0003   | 0.0003   | 0.0001   | 0.0001   | 0.3171   | 0.0006   |
| <i>Microcystis novacekii</i> (Komárek) Compère                                                | -        | -        | -        | -        | -        | -        | -        |
| <i>Microcystis pulvereae</i> (H.C.Wood) Forti                                                 | -        | -        | -        | -        | -        | -        | -        |
| <i>Microcystis smithii</i> Komárek & Anagnostidis                                             | -        | -        | -        | -        | -        | -        | -        |
| <i>Microcystis wesenbergii</i> (Komárek) Komárek ex Komárek                                   | -        | -        | -        | -        | -        | 0.0245   | 0.0006   |
| <i>Oscillatoria limosa</i> C.Agardh ex Gomont                                                 | -        | -        | -        | -        | -        | -        | -        |
| <i>Oscillatoria simplicissima</i> Gomont                                                      | 0.0001   | -        | -        | -        | -        | -        | -        |
| <i>Phormidium ambiguum</i> Gomont                                                             | -        | -        | -        | -        | -        | -        | -        |
| <i>Rhabdogloea smithii</i> (Chodat & F.Chodat) Komárek                                        | -        | -        | -        | -        | -        | -        | -        |
| <i>Snowella lacustris</i> (Chodat) Komárek & Hindák                                           | -        | -        | -        | -        | -        | -        | -        |
| <i>Woronichinia naegeliana</i> (Unger) Elenkin                                                | -        | -        | -        | 0.0001   | -        | 0.0196   | 0.0001   |

**Table S2e.** Biomass (mg L<sup>-1</sup>) of cyanobacterial species in ice samples collected in Ytyk-Kyuyol Lake. “–” denotes to Species was not discovered in the sample, date format is DD.MM.YY.

| Sampling Date                                                                                 | 10.12.21 | 05.01.22 | 16.02.22 | 24.03.22 | 22.04.22 | 24.10.22 | 25.11.22 |
|-----------------------------------------------------------------------------------------------|----------|----------|----------|----------|----------|----------|----------|
| <i>Anabaena aequalis</i> O.Borge                                                              | -        | -        | -        | -        | -        | -        | -        |
| <i>Anabaena augstumalis</i> Schmidle                                                          | -        | -        | -        | -        | -        | -        | -        |
| <i>Anabaena laxa</i> A.Braun                                                                  | -        | -        | -        | -        | -        | -        | -        |
| <i>Anathece clathrata</i> (West & G.S.West) Komárek, Kastovsky & Jezberová                    | -        | -        | -        | -        | -        | -        | -        |
| <i>Anathece endophytica</i> (W. & G.S.West) Komárek, Kastovsky & Jezberová                    | -        | -        | -        | -        | -        | -        | -        |
| <i>Aphanizomenon flos-aquae</i> Ralfs ex Bornet & Flahault                                    | -        | -        | -        | -        | -        | -        | -        |
| <i>Aphanocapsa delicatissima</i> West & G.S.West                                              | -        | -        | -        | -        | -        | -        | -        |
| <i>Aphanocapsa grevillei</i> (Berkeley) Rabenhorst                                            | 0.00005  | 0.0001   | 0.0001   | 0.0001   | 0.00005  | 0.0240   | 0.0008   |
| <i>Aphanocapsa holsatica</i> (Lemmermann) G.Cronberg & Komárek                                | -        | -        | -        | -        | -        | -        | -        |
| <i>Aphanocapsa planctonica</i> (G.M.Smith) Komárek & Anagnostidis                             | -        | -        | -        | -        | -        | -        | -        |
| <i>Aphanothece microscopica</i> Nägeli                                                        | -        | -        | -        | -        | 0.00002  | -        | -        |
| <i>Coelomoron pusillum</i> (Van Goor) Komárek                                                 | 0.00003  | -        | -        | 0.0001   | 0.00002  | -        | -        |
| <i>Dolichospermum circinale</i> (Rabenhorst ex Bornet & Flahault) Wacklin, Hoffmann & Komárek | -        | -        | -        | -        | -        | -        | -        |
| <i>Dolichospermum smithii</i> (Komárek) Wacklin, L.Hoffmann & Komárek                         | -        | -        | -        | -        | -        | -        | -        |
| <i>Dolichospermum spiroides</i> (Klebahn) Wacklin, L.Hoffmann & Komárek                       | -        | -        | -        | -        | -        | -        | -        |
| <i>Dolichospermum viguieri</i> (Denis & Frémy) Wacklin, L.Hoffmann & Komárek                  | -        | -        | -        | -        | -        | -        | -        |
| <i>Gomphosphaeria aponina</i> Kützing                                                         | -        | -        | -        | -        | -        | -        | -        |
| <i>Kamptonema chlorinum</i> (Kützing ex Gomont) Strunecký, Komárek & J.Smarda                 | -        | -        | -        | -        | -        | -        | -        |
| <i>Merismopedia minima</i> G.Beck in G.Beck & Zahlbruckner                                    | -        | -        | -        | -        | -        | -        | -        |
| <i>Merismopedia tenuissima</i> Lemmermann                                                     | -        | -        | -        | -        | -        | -        | -        |
| <i>Microcystis aeruginosa</i> (Kützing) Kützing                                               | -        | 0.0003   | -        | 0.0001   | 0.0001   | 0.7680   | 0.0011   |
| <i>Microcystis botrys</i> Teiling                                                             | -        | -        | -        | -        | -        | 0.0083   | -        |
| <i>Microcystis flos-aquae</i> (Wittrock) Kirchner                                             | 0.0003   | 0.0003   | 0.0003   | 0.0002   | 0.0001   | 0.7680   | 0.0008   |
| <i>Microcystis novacekii</i> (Komárek) Compère                                                | -        | -        | -        | -        | -        | -        | -        |
| <i>Microcystis pulvereae</i> (H.C.Wood) Forti                                                 | -        | -        | -        | -        | -        | -        | -        |
| <i>Microcystis smithii</i> Komárek & Anagnostidis                                             | -        | 0.0001   | -        | -        | -        | -        | -        |
| <i>Microcystis wesenbergii</i> (Komárek) Komárek ex Komárek                                   | 0.0004   | -        | -        | -        | -        | 0.0320   | 0.0011   |
| <i>Oscillatoria limosa</i> C.Agardh ex Gomont                                                 | -        | -        | -        | -        | -        | -        | -        |
| <i>Oscillatoria simplicissima</i> Gomont                                                      | -        | -        | -        | -        | -        | -        | -        |
| <i>Phormidium ambiguum</i> Gomont                                                             | -        | -        | -        | -        | -        | -        | -        |
| <i>Rhabdogloea smithii</i> (Chodat & F.Chodat) Komárek                                        | -        | -        | -        | -        | -        | -        | 0.00003  |
| <i>Snowella lacustris</i> (Chodat) Komárek & Hindák                                           | 0.0002   | 0.0002   | -        | -        | 0.00004  | -        | -        |
| <i>Woronichinia naegeliana</i> (Unger) Elenkin                                                | -        | -        | 0.0001   | 0.0001   | 0.0001   | -        | -        |

**Table S3.** Intracellular MCs congeners concentration (ng L<sup>-1</sup>) detected in cells filtered from natural water and ice samples. Sample types: SW – surface water, BW – bottom water, I – ice sample. “–” denotes to the concentration below LOD (< 0,1 ng L<sup>-1</sup>), date format is DD.MM.YY.

| Sample type | Sampling date | [D-Asp <sup>3</sup> ] MC-LR | MC-LR   | [D-Asp <sup>3</sup> ] MC-RR | MC-RR | MC-YR | [D-Asp <sup>3</sup> ] MC-YR | MC-WR | [D-Asp <sup>3</sup> , ADMAdda <sup>5</sup> ] MC-LR | Total content |
|-------------|---------------|-----------------------------|---------|-----------------------------|-------|-------|-----------------------------|-------|----------------------------------------------------|---------------|
| SW          | 01.08.21      | 16.0                        | --300.0 | 11.0                        | 354.0 | 110.0 | 7.0                         | -     | 5.0                                                | 803.0         |
| SW          | 04.10.21      | 4.2                         | --100.3 | 22.8                        | 152.4 | -     | -                           | -     | -                                                  | 279.7         |
| SW          | 10.12.21      | -                           | 4.1     | -                           | 6.9   | -     | -                           | -     | -                                                  | 11.0          |
| SW          | 05.01.22      | -                           | -       | -                           | 2.5   | -     | -                           | -     | -                                                  | 2.5           |
| SW          | 16.02.22      | -                           | -       | -                           | 0.8   | -     | -                           | -     | -                                                  | 0.8           |
| SW          | 24.03.22      | -                           | -       | -                           | -     | -     | -                           | -     | -                                                  | < 0.1         |
| SW          | 22.04.22      | -                           | -       | -                           | -     | -     | -                           | -     | -                                                  | < 0.1         |
| SW          | 27.05.22      | -                           | -       | -                           | 1.2   | -     | -                           | -     | -                                                  | 1.2           |
| SW          | 22.06.22      | -                           | -       | 0.4                         | 16.3  | -     | -                           | -     | -                                                  | 16.6          |
| SW          | 28.07.22      | -                           | 3.6     | -                           | 7.1   | -     | -                           | -     | -                                                  | 10.7          |
| SW          | 11.08.22      | 1.8                         | 66.5    | -                           | 57.0  | 9.1   | -                           | 1.1   | -                                                  | 135.5         |
| SW          | 27.08.22      | 0.5                         | 22.3    | 0.7                         | 10.0  | 1.9   | -                           | -     | -                                                  | 35.3          |
| SW          | 26.09.22      | 0.2                         | 5.5     | -                           | 4.2   | 0.5   | -                           | -     | -                                                  | 10.3          |
| SW          | 24.10.22      | -                           | 2.8     | -                           | 1.6   | 0.2   | -                           | -     | -                                                  | 4.6           |
| SW          | 25.11.22      | -                           | 1.0     | -                           | 1.3   | -     | -                           | -     | -                                                  | 2.3           |
| BW          | 10.12.21      | -                           | 1.3     | -                           | 2.2   | -     | -                           | -     | -                                                  | 3.5           |
| BW          | 05.01.22      | -                           | -       | -                           | 2.4   | -     | -                           | -     | -                                                  | 2.4           |
| BW          | 16.02.22      | -                           | -       | -                           | 0.8   | -     | -                           | -     | -                                                  | 0.8           |
| BW          | 24.03.22      | -                           | -       | -                           | -     | -     | -                           | -     | -                                                  | < 0.1         |
| BW          | 22.04.22      | -                           | -       | -                           | -     | -     | -                           | -     | -                                                  | < 0.1         |
| BW          | 22.06.22      | -                           | 38.1    | -                           | -     | -     | -                           | -     | -                                                  | 38.1          |
| BW          | 28.07.22      | -                           | 3.0     | -                           | 4.8   | -     | -                           | -     | -                                                  | 7.8           |
| BW          | 27.08.22      | 0.8                         | 44.0    | -                           | 18.0  | 3.2   | -                           | 0.8   | -                                                  | 66.8          |
| BW          | 26.09.22      | 0.1                         | 4.4     | -                           | 2.5   | 0.4   | -                           | -     | -                                                  | 7.4           |
| BW          | 24.10.22      | 0.1                         | 2.9     | -                           | 1.9   | 0.6   | -                           | -     | -                                                  | 5.5           |
| BW          | 25.11.22      | -                           | 2.0     | -                           | 1.2   | 0.3   | -                           | -     | -                                                  | 3.5           |
| I           | 10.12.21      | -                           | 6.3     | -                           | 5.5   | -     | -                           | -     | -                                                  | 11.8          |
| I           | 05.01.22      | -                           | -       | -                           | 0.3   | -     | -                           | -     | -                                                  | 0.3           |
| I           | 16.02.22      | -                           | -       | -                           | 0.2   | -     | -                           | -     | -                                                  | 0.2           |
| I           | 24.03.22      | -                           | -       | -                           | -     | -     | -                           | -     | -                                                  | < 0.1         |
| I           | 22.04.22      | -                           | -       | -                           | -     | -     | -                           | -     | -                                                  | < 0.1         |
| I           | 24.10.22      | 0.9                         | 27.3    | -                           | 14.4  | 5.5   | 0.2                         | -     | 0.4                                                | 48.6          |
| I           | 25.11.22      | -                           | 1.9     | -                           | 1.1   | 0.3   | -                           | -     | -                                                  | 3.2           |

**Table S4.** Extracellular MCs congeners concentration detected in filtered surface water. “–” denotes to the concentration below LOD (< 0,1 ng L<sup>-1</sup>), date format is DD.MM.YY.

---

| Sampling date | MC-LR | [D-Asp <sup>3</sup> ]MC-RR | MC-RR | Total content, ng L <sup>-1</sup> |
|---------------|-------|----------------------------|-------|-----------------------------------|
| 22.06.22      | 6.3   | 0.2                        | 13.3  | 19.8                              |
| 28.07.22      | -     | -                          | 1.6   | 1.6                               |
| 11.08.22      | 1.4   | -                          | 0.5   | 1.9                               |

---

**Table S5.** Mean values of total abundance and biomass of cyanobacterial species and standard deviation

| Sampling Date | Sampling medium | Depth of sampling layer | Mean value of total abundance, cells x 10 <sup>6</sup> ·L <sup>-1</sup> / Standard deviation | Mean value of total biomass, mg·L <sup>-1</sup> / Standard deviation |
|---------------|-----------------|-------------------------|----------------------------------------------------------------------------------------------|----------------------------------------------------------------------|
| 01.08.2021    | water           | surface                 | 342.63/6.5874                                                                                | 4.8/0.563                                                            |
| 04.10.2021    | water           | surface                 | 26.3955/1.1098                                                                               | 1.6802/0.0039                                                        |
| 10.12.2021    | water           | bottom                  | 0.0215/0.0012                                                                                | 0.0008/0.0001                                                        |
| 10.12.2021    | water           | surface                 | 0.022/0.0015                                                                                 | 0.0007/0.0001                                                        |
| 10.12.2021    | ice             | -                       | 0.0191/0.0013                                                                                | 0.001/0.0001                                                         |
| 05.01.2022    | water           | bottom                  | 0.0212/0.0013                                                                                | 0.0006/0.0001                                                        |
| 05.01.2022    | water           | surface                 | 0.0085/0.0006                                                                                | 0.0003/0.0                                                           |
| 05.01.2022    | ice             | -                       | 0.027/0.0019                                                                                 | 0.001/0.0001                                                         |
| 16.02.2022    | water           | bottom                  | 0.0113/0.0008                                                                                | 0.0003/0.0                                                           |
| 16.02.2022    | water           | surface                 | 0.0125/0.0008                                                                                | 0.0004/0.0                                                           |
| 16.02.2022    | ice             | -                       | 0.0122/0.0003                                                                                | 0.0004/0.0                                                           |
| 24.03.2022    | water           | bottom                  | 0.0107/0.0009                                                                                | 0.0002/0.0                                                           |
| 24.03.2022    | water           | surface                 | 0.0133/0.0002                                                                                | 0.0003/0.0                                                           |
| 24.03.2022    | ice             | -                       | 0.0143/0.0001                                                                                | 0.0006/0.0                                                           |
| 22.04.2022    | water           | bottom                  | 0.0017/0.0001                                                                                | 0.0001/0.0                                                           |
| 22.04.2022    | water           | surface                 | 0.0019/0.0002                                                                                | 0.0001/0.0                                                           |
| 22.04.2022    | ice             | -                       | 0.0102/0.0005                                                                                | 0.0004/0.0                                                           |
| 27.05.2022    | water           | surface                 | 20.5961/1.9237                                                                               | 0.8/0.0841                                                           |
| 22.06.2022    | water           | surface                 | 96.8001/5.4476                                                                               | 4.0973/0.3234                                                        |
| 22.06.2022    | water           | bottom                  | 60.6626/4.5519                                                                               | 2.7011/0.1769                                                        |
| 28.07.2022    | water           | surface                 | 80.7907/1.5661                                                                               | 3.4987/0.0947                                                        |
| 28.07.2022    | water           | bottom                  | 81.9378/2.9724                                                                               | 3.303/0.2188                                                         |
| 11.08.2022    | water           | surface                 | 110.5921/5.9092                                                                              | 4.5/0.1908                                                           |
| 27.08.2022    | water           | surface                 | 82.6061/3.5663                                                                               | 3.2987/0.2731                                                        |
| 27.08.2022    | water           | bottom                  | 85.6118/7.8648                                                                               | 3.3988/0.3784                                                        |
| 26.09.2022    | water           | surface                 | 37.0918/1.2062                                                                               | 1.4991/0.0698                                                        |
| 26.09.2022    | water           | bottom                  | 32.6578/1.6237                                                                               | 1.405/0.0694                                                         |
| 24.10.2022    | water           | surface                 | 24.1362/1.1517                                                                               | 1.3696/0.1759                                                        |
| 24.10.2022    | water           | bottom                  | 16.928/0.405                                                                                 | 0.6997/0.082                                                         |
| 24.10.2022    | ice             | -                       | 35.8333/2.9251                                                                               | 1.6003/0.111                                                         |
| 25.11.2022    | water           | surface                 | 0.0428/0.0023                                                                                | 0.0014/0.0001                                                        |
| 25.11.2022    | water           | bottom                  | 0.056/0.0021                                                                                 | 0.0022/0.0003                                                        |
| 25.11.2022    | ice             | -                       | 0.0924/0.0027                                                                                | 0.0038/0.0                                                           |

---
